# Supplementary material for: Patient and Provider Cocreation of Mobile Texting Apps to Support Behavioral Health: Usability Study
Source: PubMed Central journal article supplement (PMC7424494; doi:10.2196/12655), 2020-07-29
Supplement: mhealth_v8i7e12655_app1.pdf [file mhealth_v8i7e12655_app1.pdf]

Name: \_\_\_\_\_ Date: \_\_\_\_\_

## Chorus Messaging Application Study - Patient Survey

|                                                                                                    | Strongly Disagree |   | Neutral |   |   | Strongly Agree |   |    |
|----------------------------------------------------------------------------------------------------|-------------------|---|---------|---|---|----------------|---|----|
| 1. It is simple to use this messaging application.                                                 | 1                 | 2 | 3       | 4 | 5 | 6              | 7 | NA |
| 2. I feel comfortable using this messaging application.                                            | 1                 | 2 | 3       | 4 | 5 | 6              | 7 | NA |
| 3. It was easy to learn to use this messaging application.                                         | 1                 | 2 | 3       | 4 | 5 | 6              | 7 | NA |
| 4. I believe I became productive quickly using this messaging application.                         | 1                 | 2 | 3       | 4 | 5 | 6              | 7 | NA |
| 5. Whenever I make a mistake using the messaging application, I recover easily and quickly.        | 1                 | 2 | 3       | 4 | 5 | 6              | 7 | NA |
| 6. The web interface of this messaging application is pleasant.                                    | 1                 | 2 | 3       | 4 | 5 | 6              | 7 | NA |
| 7. I like using the web interface of this messaging application.                                   | 1                 | 2 | 3       | 4 | 5 | 6              | 7 | NA |
| 8. This messaging application has all the functions and capabilities I expect it to have.          | 1                 | 2 | 3       | 4 | 5 | 6              | 7 | NA |
| 9. I can effectively develop messages with my provider using this messaging application.           | 1                 | 2 | 3       | 4 | 5 | 6              | 7 | NA |
| 10. I feel more engaged in my treatment as a result of using this messaging application.           | 1                 | 2 | 3       | 4 | 5 | 6              | 7 | NA |
| 11. Overall, I am satisfied with this messaging application.                                       | 1                 | 2 | 3       | 4 | 5 | 6              | 7 | NA |
| 12. I was directly involved in creating the text messages I would receive.                         | 1                 | 2 | 3       | 4 | 5 | 6              | 7 | NA |
| 13. Information provided by the text messages is relevant to me and my recovery.                   | 1                 | 2 | 3       | 4 | 5 | 6              | 7 | NA |
| 14. The information provided by the text messages is easy to understand.                           | 1                 | 2 | 3       | 4 | 5 | 6              | 7 | NA |
| 15. Receiving these text messages is effective in helping me complete the treatment plans at home. | 1                 | 2 | 3       | 4 | 5 | 6              | 7 | NA |
| 16. I feel comfortable interacting with these text messages.                                       | 1                 | 2 | 3       | 4 | 5 | 6              | 7 | NA |

List the most **negative** aspect(s):

1. \_\_\_\_\_
2. \_\_\_\_\_
3. \_\_\_\_\_

List the most **positive** aspect(s):

1. \_\_\_\_\_
2. \_\_\_\_\_
3. \_\_\_\_\_
